# Supplementary material for: Transcriptomic landscape of the blastema niche in regenerating adult axolotl limbs at single-cell resolution
Source: PubMed Central journal article supplement (PMC6279788; doi:10.1038/s41467-018-07604-0), 2018-12-04
Supplement: 41467_2018_7604_MOESM1_ESM.pdf [file 41467_2018_7604_MOESM1_ESM.pdf]

**Supplementary information for Leigh et al.**

**Transcriptomic landscape of the blastema niche in regenerating adult axolotl  
limbs at single-cell resolution**

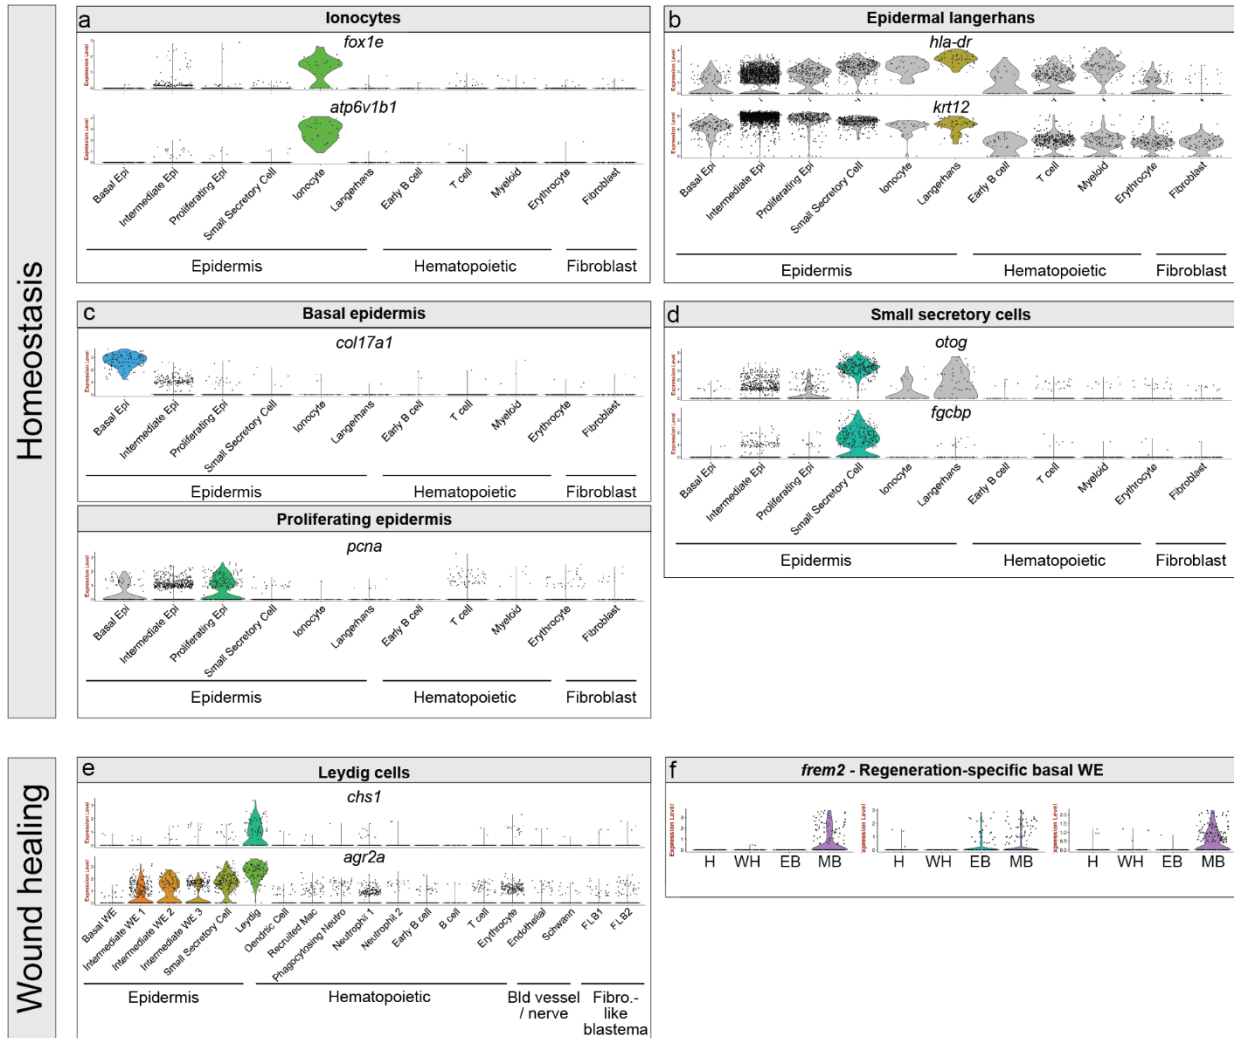

**Supplementary Figure 1: Marker genes for epidermal populations.** (a) Violin plots depicting ionocyte-enriched genes *fox1e*, and *atp6v1b1* in homeostatic limbs. (b) Violin plots depicting epidermal Langerhans-enriched genes *hla-dr*, and *krt12* in homeostatic limbs. (c) Violin plots depicting basal epidermis-enriched gene *col17a1* and proliferating epidermis enriched-gene *pcna*, in homeostatic limbs. (d) Violin plots depicting small secretory cells-enriched genes *otog* and *fgcbp* in homeostatic limbs. (e) Violin plots depicting Leydig cell-enriched genes *chs1* and *agr2a* at wound healing. (f) Expression of three isoforms of *frem2* at homeostasis (H), wound healing (WH), early-bud blastema (EB) and medium-bud blastema (MB). Each dot represents an individual cell. See Supplementary Table II for population abbreviation definitions.

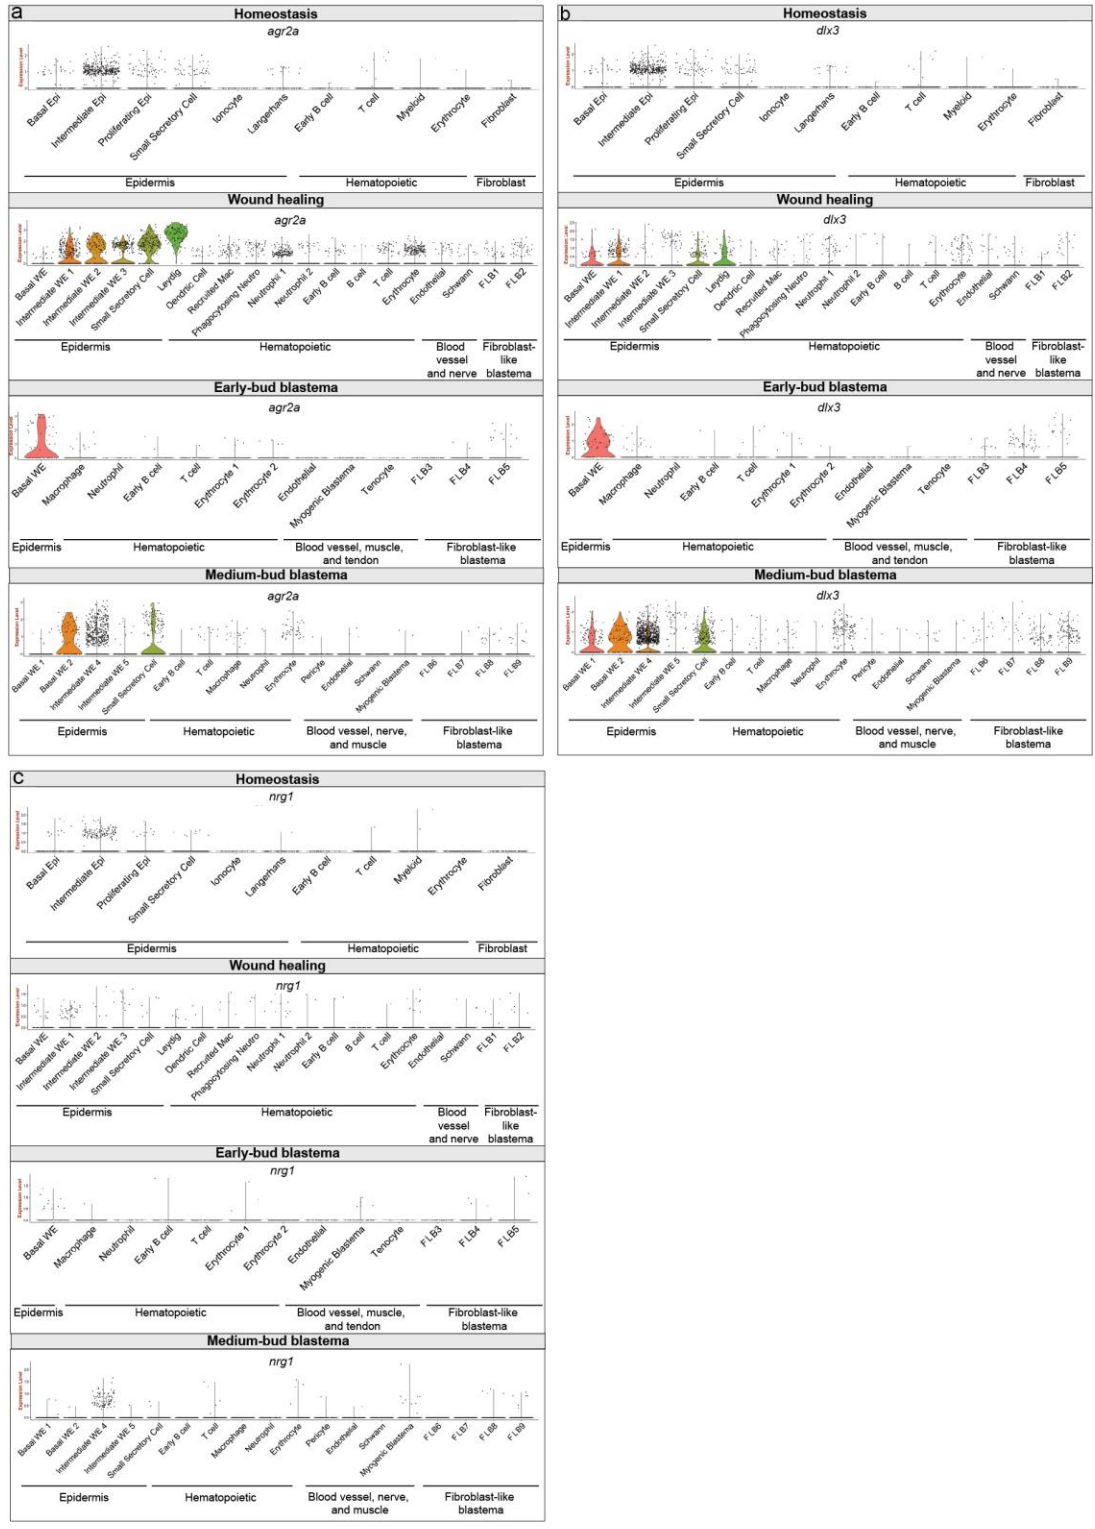

**Supplementary Figure 2: Expression of genes previously described to be expressed in or near the wound epidermis.** (a-c) Violin plots depicting (a) *agr2a*, (b) *dlx3*, and (c) *nrg1* in homeostatic limbs, wound healing, early-bud blastemas, and medium-bud blastemas. Each dot represents an individual cell. See Supplementary Table II for population abbreviation definitions.

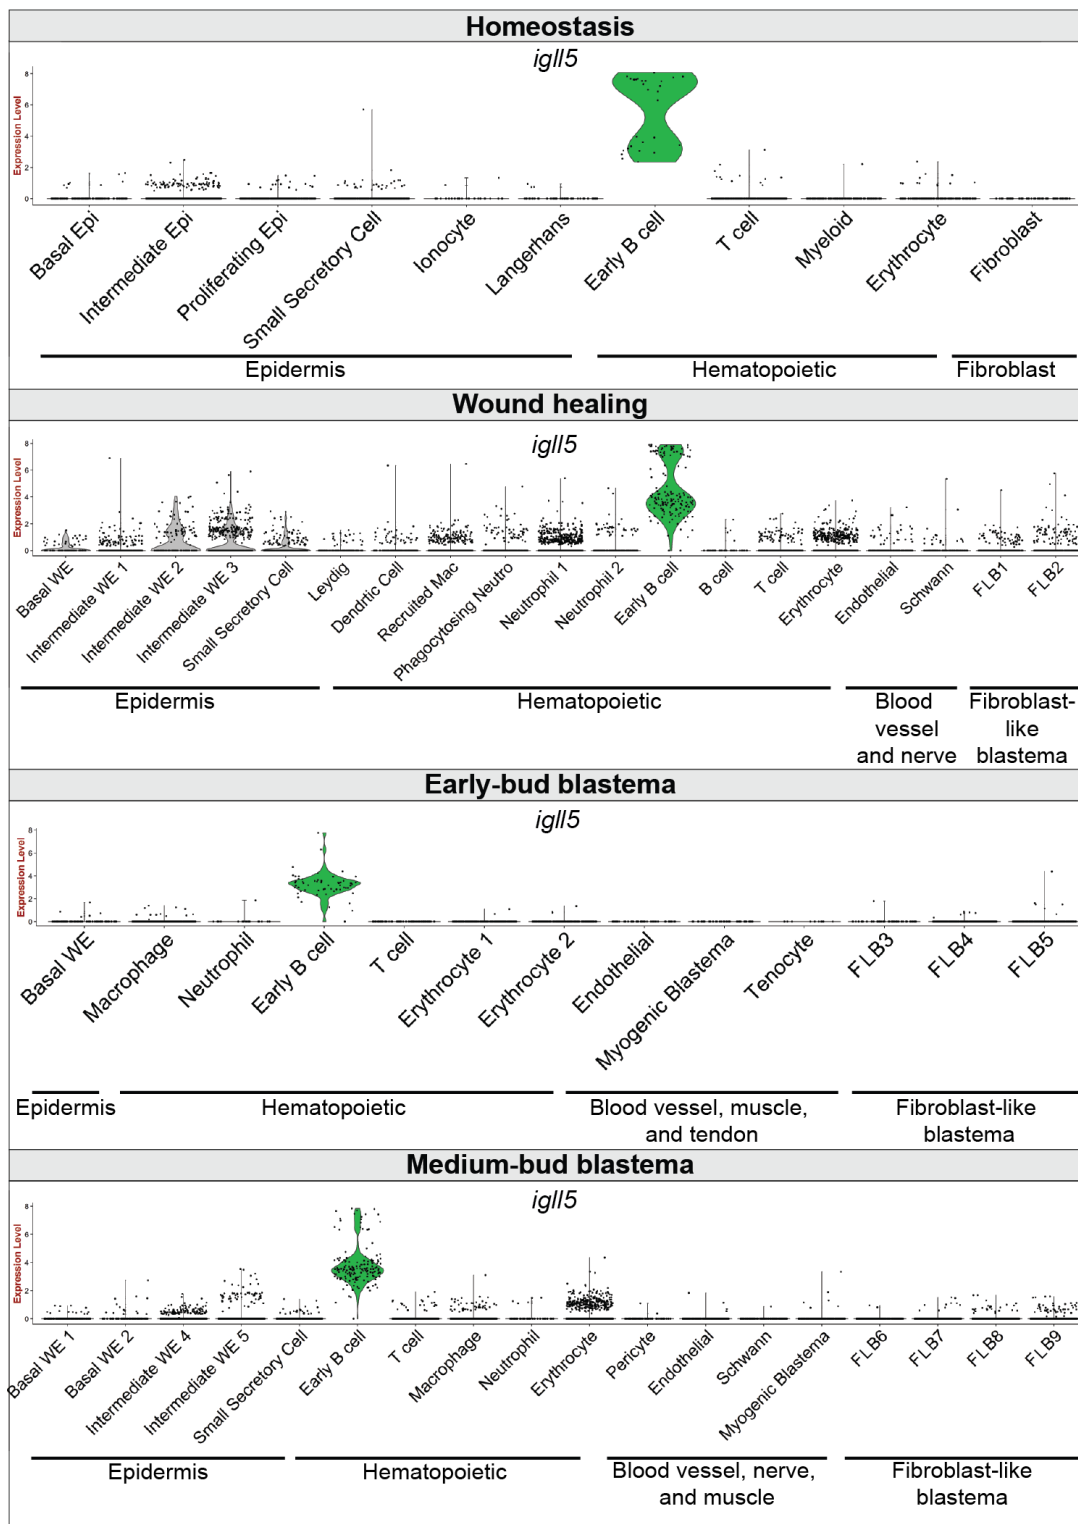

**Supplementary Figure 3: Expression of B cell genes *igll5*.** Violin plots depicting *igll5* expression in homeostatic limbs, wound healing, early-bud blastemas, and medium-bud blastemas. Each dot represents an individual cell.

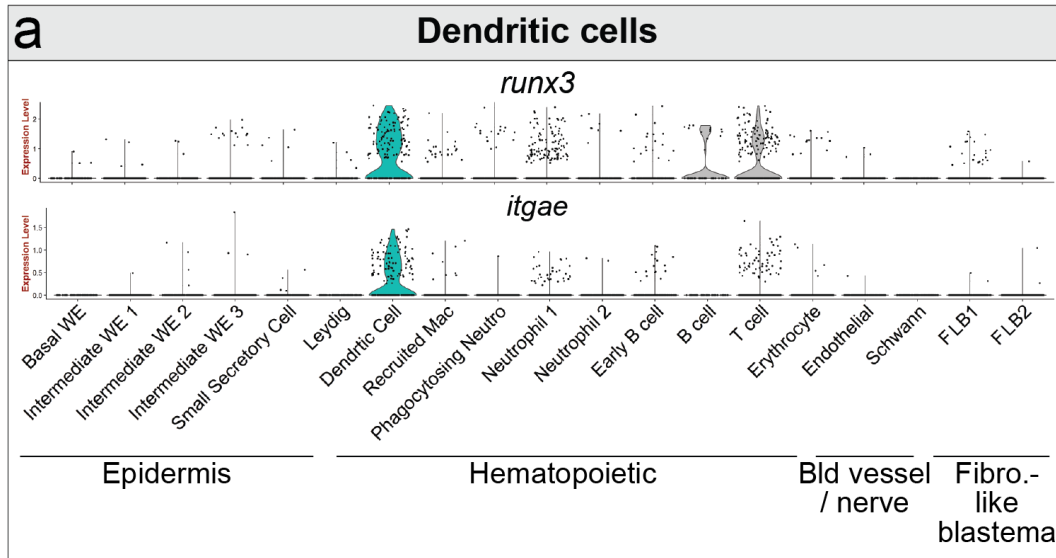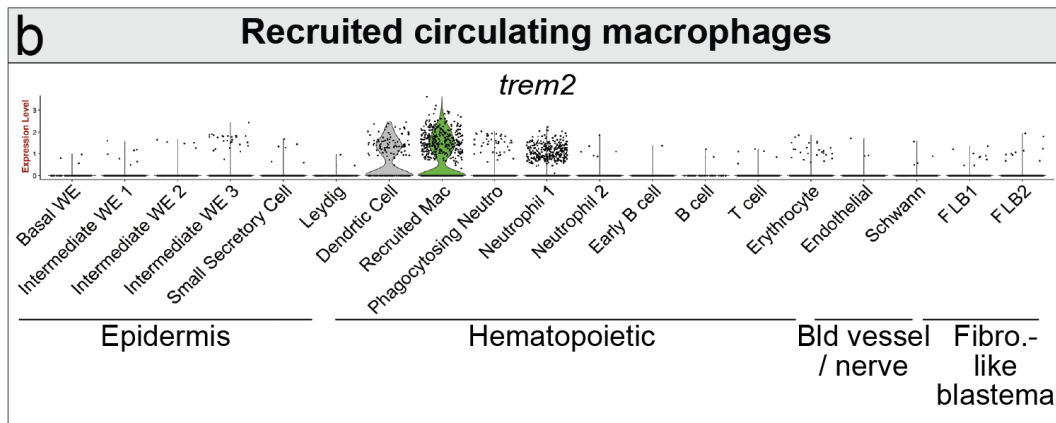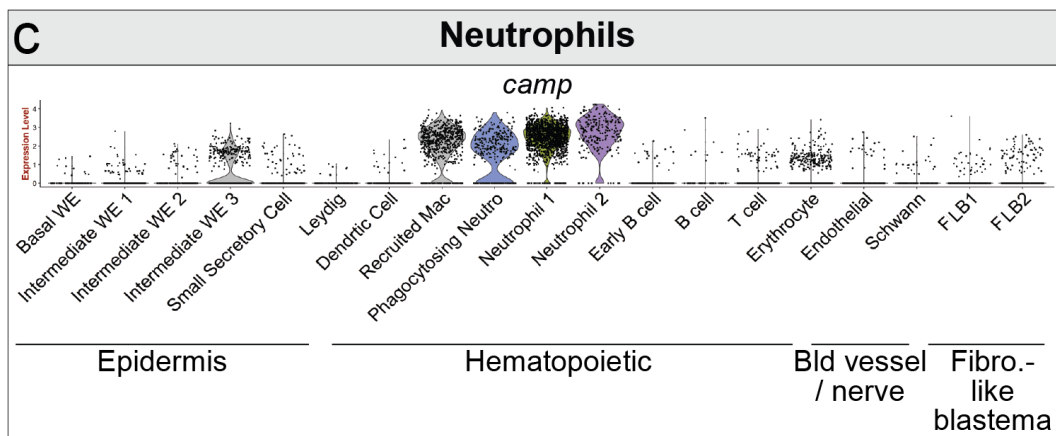

**Supplementary Figure 4: Expression of myeloid cell-enriched genes at wound healing** (a) Violin plots depicting dendritic cell markers *runx3* and *itgae*. (b) Violin plots depicting recruited macrophage enriched genes *trem2*. (c) Violin plots depicting neutrophil enriched gene *camp*. Each dot represents an individual cell.

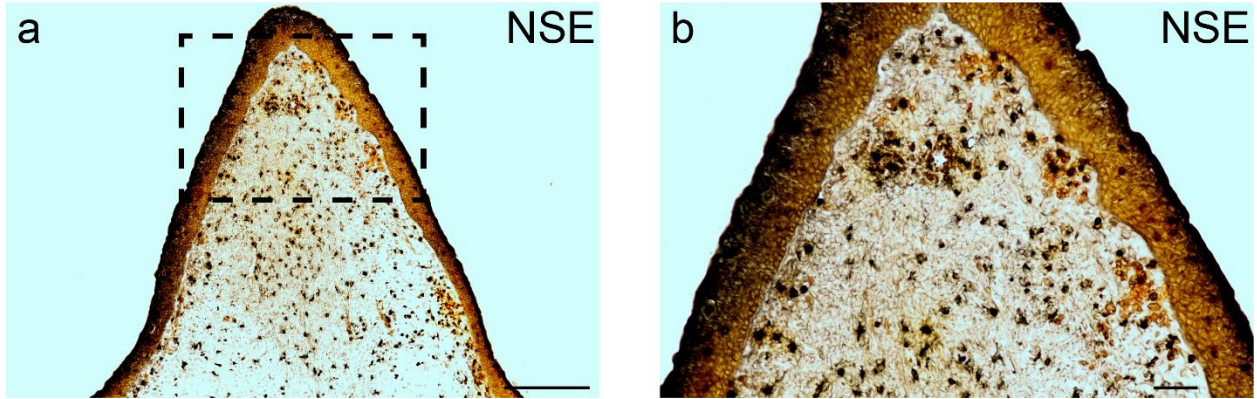

**Supplementary Figure 5: Myeloid cells are present in medium-bud blastemas.**  $\alpha$ -naphthyl acetate (NSE) staining of a medium-bud blastema, (a) 10x magnification (b) area outlined in a at 20x magnification. All scale bars are 100 $\mu$ m. n = 4 medium-bud blastemas from four animals.

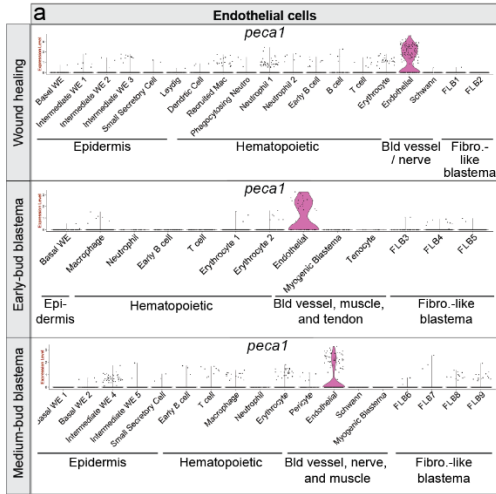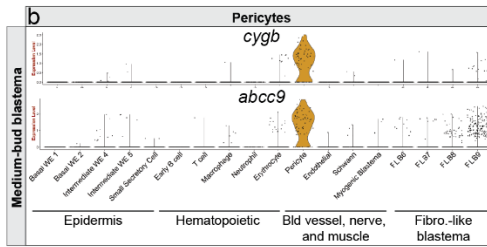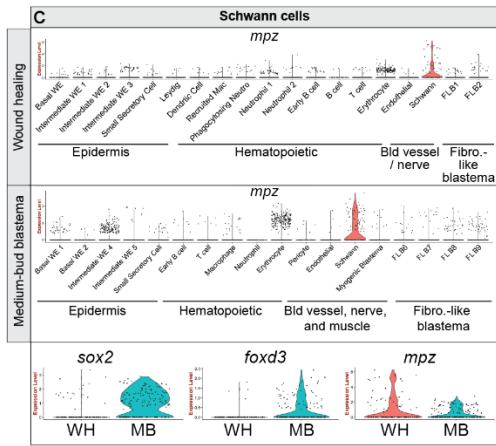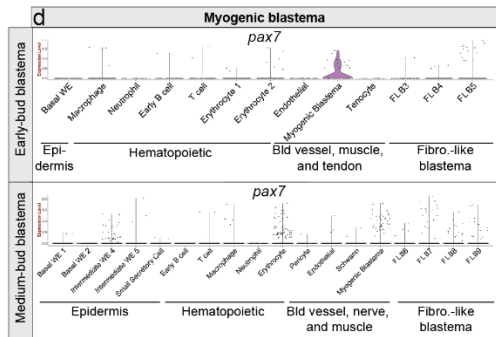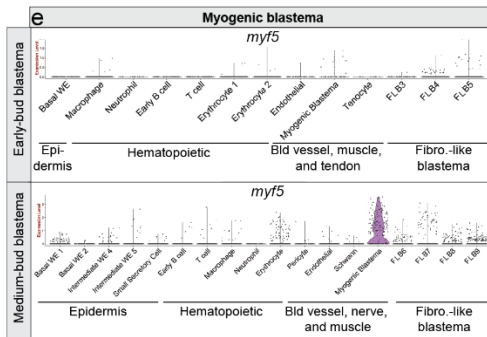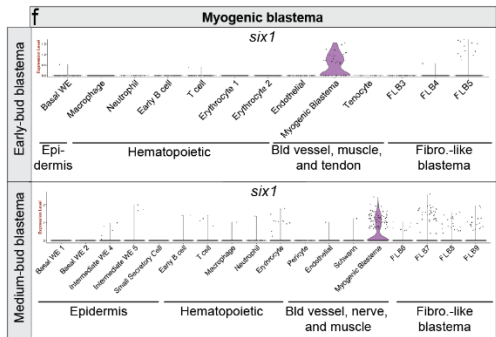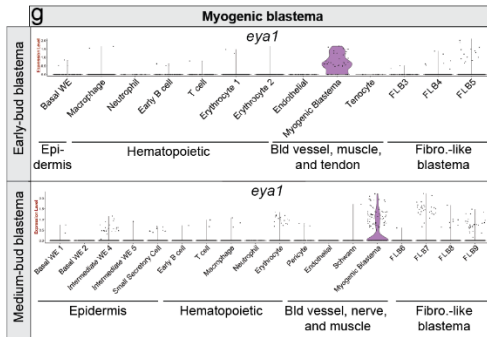

**Supplementary Figure 6: Marker genes for putative blastema populations—endothelial cells, pericytes, Schwann cells, and myogenic blastema.** (a) Violin plot depicting endothelial cell marker *pecam1* at wound healing, early-bud blastema, and medium-bud blastema stages. (b) Violin plot depicting pericyte markers *cygb* and *abcc9* in the medium-bud blastema. (c) Violin plot depicting Schwann cell marker *mpz* at wound healing and in the medium-bud blastema (top) and violin plots depicting Schwann cell expression of *sox2*, *foxd3*, and *mpz* at wound healing (WH) and medium-bud blastema (MB) stages. (d-g) Violin plot depicting myogenic blastema markers (d) *pax7*, (e) *myf5*, (f) *six1*, and (g) *eya1* in the early- and medium-bud blastema. Each dot represents an individual cell.



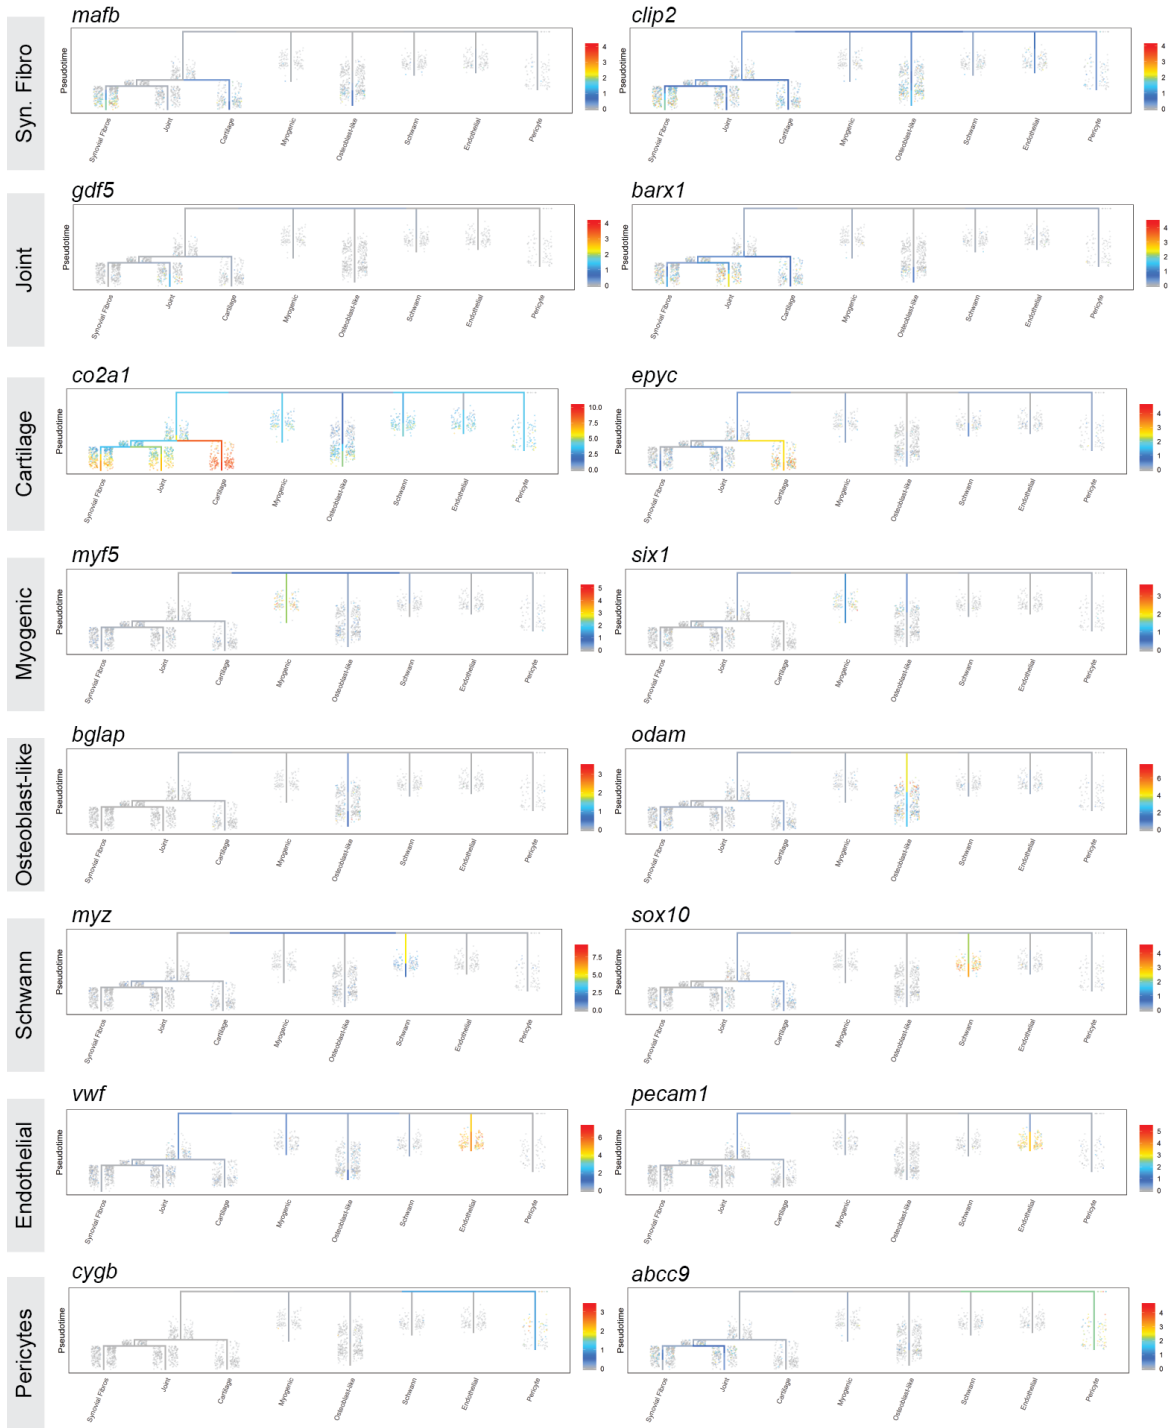

**Supplementary Figure 6: Tip markers plotted on trajectory tree.** Population-enriched genes overlaid on the trajectory tree. Markers for synovial fibroblasts (*mafb*, *clip2*), joint-like (*gdf5*, *barx1*), cartilage (*col2a1*, *epyc*), myogenic blastema (*myf5*, *six1*), osteoblast-like fibroblasts (*bglap*, *odam*), Schwann cells (*myz*, *sox10*), endothelial cells (*vwf*, *pecam1*), and pericytes (*cygb*, *abcc9*).

Supplementary Table 1: Sample metadata and data accessibility

| <b>Sample Name</b> | <b>DPA</b> | <b>Stage</b>  | <b>Replicate</b> | <b>Sex</b> | <b>Length (cm)</b> | <b>Side</b> | <b>Cells</b> | <b>GEO Accession #</b> |
|--------------------|------------|---------------|------------------|------------|--------------------|-------------|--------------|------------------------|
| S1                 | 23         | Medium-bud    | 1                | M          | 21.5               | R           | 1679         | GSE121737              |
| S2                 | 23         | Medium-bud    | 2                | F          | 18.25              | R           | 1836         | GSE121737              |
| S4                 | 23         | Medium-bud    | 3                | M          | 21                 | L           | 3212         | GSE121737              |
| N1                 | 23         | Medium-bud    | 4                | F          | 19.5               | R           | 2188         | GSE121737              |
| N2                 | 23         | Medium-bud    | 5                | F          | 17.5               | L           | 2260         | GSE121737              |
| N3                 | 23         | Medium-bud    | 6                | M          | 19                 | L           | 1356         | GSE121737              |
| S3                 | 14         | Early-bud     | 1                | F          | 18.5               | L           | 1291         | GSE121737              |
| S5                 | 14         | Early-bud     | 2                | M          | 21.25              | R           | 722          | GSE121737              |
| N4                 | 3          | Wound healing | 1                | F          | 17                 | R           | 2678         | GSE121737              |
| N5                 | 3          | Wound healing | 2                | M          | 21.5               | L           | 1986         | GSE121737              |
| N6                 | 3          | Wound healing | 3                | M          | 20                 | R           | 2606         | GSE121737              |
| S1                 | N/A        | Homeostasis   | 1                | M          | 19                 | R           | 981          | GSE121737              |
| S2                 | N/A        | Homeostasis   | 2                | M          | 18                 | L           | 2440         | GSE121737              |

Supplementary Table 2: Primers used to clone RNA *in situ* hybridization probes

| <b>Gene</b>  | <b>Primer Name</b> | <b>Sequence</b>             |
|--------------|--------------------|-----------------------------|
| <i>krt17</i> | krt17 F            | CCTCTTGGACGTGAAGACC         |
| <i>krt17</i> | krt17 R            | CCAGAGAAGATGAGCATACATCGG    |
| <i>frem2</i> | frem2 F            | GTGCCCAGACGTGCCTTATTTTC     |
| <i>frem2</i> | frem2 R            | GGCAACGCCTTTCATAATACTTGCC   |
| <i>apoeb</i> | apoeb F            | GGACAAGGTGAAGGAGAAGATG      |
| <i>apoeb</i> | apoeb R            | AGGTGGAAGGAGGAGCGATAG       |
| <i>otog</i>  | otog F             | CATTATGGCACTGTTTCATCGC      |
| <i>otog</i>  | otog R             | GAGTCTTCAACCTTTGTGGAA       |
| <i>krt12</i> | krt12 F            | GACAACGTACACAGCCACG         |
| <i>krt12</i> | krt12 R            | CCAGTCTTTGAATGCCTTGC        |
| <i>trac</i>  | trac F             | AGGACAGCCTTTGGTCACAGTG      |
| <i>trac</i>  | trac R             | GCTGCCATTGCCATTATTG         |
| <i>lum</i>   | lum F              | CTGCTTAGGAATAAGAGCTTTCGG    |
| <i>lum</i>   | lum R              | AAGCTTAGGAATACTCTGAGATGCTTC |
| <i>dpt</i>   | dpt F              | GGGACAGAATGGTATCAGAC        |
| <i>dpt</i>   | dpt R              | CTCGCATTGATTGGTTGCAG        |
